# Supplementary material
Source: PubMed Central journal article supplement (PMC5462032)
Supplement: supp_pp.17.00294_00177R2_Supplemental_Table_2.pdf [file supp_pp.17.00294_00177R2_Supplemental_Table_2.pdf]

| GeneID    | epic1_vs_silex | axe1-5 (To et al, 2011) | met1-3 (To et al, 2011) | annotation                                          |
|-----------|----------------|-------------------------|-------------------------|-----------------------------------------------------|
| AT2G05915 | 28.4           | #N/A                    | #N/A                    | unknown protein                                     |
| AT2G15800 | 22.5           | #N/A                    | #N/A                    | transposable element gene                           |
| AT3G01345 | 22.2           |                         | 49.2                    | 49.2 Expressed protein                              |
| AT5G26270 | 20.3           |                         | 45.5                    | 45.5 unknown protein                                |
| AT2G15520 | 14.5           | #N/A                    | #N/A                    | transposable element gene                           |
| AT2G15810 | 13.2           | #N/A                    | #N/A                    | transposable element gene                           |
| AT4G38820 | 11.4           | #N/A                    | #N/A                    | unknown protein                                     |
| AT4G04293 | 10.9           |                         | 7.5                     | 7.5 transposable element gene                       |
| AT1G65330 | 9.1            | #N/A                    | #N/A                    | PHE1 (PHERES1); DNA binding / transcription factor  |
| AT4G20325 | 7.2            | #N/A                    | #N/A                    | unknown protein                                     |
| AT3G29130 | 6.6            | #N/A                    | #N/A                    | unknown protein                                     |
| AT5G48595 | 6.3            | #N/A                    | #N/A                    | Defensin-like (DEFL) family protein                 |
| AT3G43160 | 6.3            | #N/A                    | #N/A                    | MEE38 (maternal effect embryo arrest 38)            |
| AT1G51645 | 6.3            | #N/A                    | #N/A                    | other RNA                                           |
| AT1G01210 | 6.0            | #N/A                    | #N/A                    | DNA-directed RNA polymerase III family protein      |
| AT3G30720 | 5.9            |                         | 7.1                     | 7.1 QQS (QUA-QUINE STARCH)                          |
| AT3G19230 | 5.8            | #N/A                    | #N/A                    | leucine-rich repeat family protein                  |
| AT1G13605 | 5.8            | #N/A                    | #N/A                    | Encodes a defensin-like (DEFL) family protein.      |
| AT2G43520 | 5.4            | #N/A                    | #N/A                    | ATTI2; serine-type endopeptidase inhibitor          |
| AT3G18320 | 5.4            | #N/A                    | #N/A                    | F-box family protein                                |
| AT2G22820 | 5.3            | #N/A                    | #N/A                    | unknown protein                                     |
| AT5G48290 | 5.0            | #N/A                    | #N/A                    | heavy-metal-associated domain-containing protein    |
| AT2G13430 | 5.0            | #N/A                    | #N/A                    | unknown protein                                     |
| AT3G09162 | 4.9            | #N/A                    | #N/A                    | unknown protein                                     |
| AT5G15780 | 4.7            | #N/A                    | #N/A                    | pollen Ole e 1 allergen and extensin family protein |
| AT3G29140 | 4.7            | #N/A                    | #N/A                    | unknown protein                                     |
| AT1G72230 | 4.7            | #N/A                    | #N/A                    | plastocyanin-like domain-containing protein         |
| AT2G07215 | 4.7            | #N/A                    | #N/A                    | unknown protein                                     |
| AT1G46048 | 4.6            | #N/A                    | #N/A                    | pseudogene                                          |
| AT2G30000 | 4.5            | #N/A                    | #N/A                    | PHF5-like protein                                   |
| AT2G20208 | 4.4            | #N/A                    | #N/A                    | LCR60 (Low-molecular-weight cysteine-rich 60)       |
| AT3G29639 | 4.4            | #N/A                    | #N/A                    | Transcription elongation factor S-II protein        |
| AT4G16515 | 4.4            | #N/A                    | #N/A                    | unknown protein                                     |
| AT1G70830 | 4.4            | #N/A                    | #N/A                    | MLP28 (MLP-LIKE PROTEIN 28)                         |
| AT5G10160 | 4.3            | #N/A                    | #N/A                    | beta-hydroxyacyl-ACP dehydratase, putative          |
| AT3G27370 | 4.2            | #N/A                    | #N/A                    | histone H3                                          |
| AT1G10100 | 4.2            | #N/A                    | #N/A                    | unknown protein                                     |
| AT2G22170 | 4.2            | #N/A                    | #N/A                    | lipid-associated family protein                     |
| AT1G38194 | 4.1            |                         | 8.7                     | 8.7 transposable element gene                       |
| AT1G36590 | 4.1            | #N/A                    | #N/A                    | transposable element gene                           |
| AT1G10747 | 4.1            | #N/A                    | #N/A                    | Maternally expressed gene (MEG) family protein      |
| AT2G16200 | 4.0            | #N/A                    | #N/A                    | protein binding / structural molecule               |
| AT2G11623 | 4.0            | #N/A                    | #N/A                    | unknown protein                                     |

Supplemental Table 2. Up-regulated genes in the *hda6-8* allele.
