# Supplementary material
Source: PubMed Central journal article supplement (PMC5462032)
Supplement: supp_pp.17.00294_00294Johnson1_Supp_Figure_S1.pdf [file supp_pp.17.00294_00294Johnson1_Supp_Figure_S1.pdf]

**A**

|         | AtAGP2 | AtAGP3 | AtAGP4 | AtAGP7 | AtAGP5 | AtAGP10 | AtAGP9 | AtAGP1 | AtAGP58 | AtAGP17 | AtAGP18 | AtAGP6 | AtAGP11 | AtAGP25 | AtAGP27 | AtAGP26 | AtAGP51 |
|---------|--------|--------|--------|--------|--------|---------|--------|--------|---------|---------|---------|--------|---------|---------|---------|---------|---------|
| AtAGP2  |        | 56.3   | 42.8   | 41.3   | 30.7   | 27.1    | 23.8   | 25.0   | 20.4    | 20.9    | 16.1    | 21.0   | 21.4    | 16.8    | 14.6    | 18.5    | 13.9    |
| AtAGP3  | 56.3   |        | 37.5   | 38.0   | 30.6   | 32.6    | 21.6   | 28.8   | 20.1    | 22.3    | 19.6    | 20.4   | 20.4    | 21.0    | 14.7    | 22.6    | 18.8    |
| AtAGP4  | 42.8   | 37.5   |        | 61.6   | 39.3   | 38.1    | 28.9   | 29.0   | 23.8    | 21.5    | 18.0    | 29.4   | 29.5    | 20.0    | 17.9    | 20.0    | 17.4    |
| AtAGP7  | 41.3   | 38.0   | 61.6   |        | 34.3   | 33.1    | 26.7   | 28.7   | 23.1    | 22.1    | 18.0    | 24.8   | 24.1    | 17.6    | 18.9    | 17.7    | 15.2    |
| AtAGP5  | 30.7   | 30.6   | 39.3   | 34.3   |        | 40.4    | 21.3   | 29.5   | 21.0    | 22.1    | 16.1    | 22.9   | 22.1    | 18.2    | 15.9    | 16.6    | 12.4    |
| AtAGP10 | 27.1   | 32.6   | 38.1   | 33.1   | 40.4   |         | 18.3   | 28.7   | 19.6    | 19.9    | 16.6    | 23.2   | 22.8    | 16.8    | 16.3    | 24.4    | 15.0    |
| AtAGP9  | 23.8   | 21.6   | 28.9   | 26.7   | 21.3   | 18.3    |        | 15.5   | 23.1    | 20.3    | 22.8    | 13.4   | 20.1    | 17.1    | 13.0    | 16.2    | 14.9    |
| AtAGP1  | 25.0   | 28.8   | 29.0   | 28.7   | 29.5   | 28.7    | 15.5   |        | 25.9    | 18.8    | 14.6    | 21.7   | 22.5    | 16.9    | 14.0    | 15.8    | 9.6     |
| AtAGP58 | 20.4   | 20.1   | 23.8   | 23.1   | 21.0   | 19.6    | 23.1   | 25.9   |         | 19.4    | 20.0    | 19.4   | 19.4    | 14.5    | 11.8    | 15.7    | 15.7    |
| AtAGP17 | 20.9   | 22.3   | 21.5   | 22.1   | 22.1   | 19.9    | 20.3   | 18.8   | 19.4    |         | 44.3    | 21.6   | 21.1    | 11.7    | 11.7    | 16.8    | 15.0    |
| AtAGP18 | 16.1   | 19.6   | 18.0   | 18.0   | 16.1   | 16.6    | 22.8   | 14.6   | 20.0    | 44.3    |         | 19.6   | 18.0    | 12.8    | 11.4    | 13.9    | 14.1    |
| AtAGP6  | 21.0   | 20.4   | 29.4   | 24.8   | 22.9   | 23.2    | 13.4   | 21.7   | 19.4    | 21.6    | 19.6    |        | 51.0    | 13.9    | 13.7    | 14.3    | 16.2    |
| AtAGP11 | 21.4   | 20.4   | 29.5   | 24.1   | 22.1   | 22.8    | 20.1   | 22.5   | 19.4    | 21.1    | 18.0    | 51.0   |         | 14.8    | 15.2    | 15.6    | 17.6    |
| AtAGP25 | 16.8   | 21.0   | 20.0   | 17.6   | 18.2   | 16.8    | 17.1   | 16.9   | 14.5    | 11.7    | 12.8    | 13.9   | 14.8    |         | 31.0    | 19.8    | 14.0    |
| AtAGP27 | 14.6   | 14.7   | 17.9   | 18.9   | 15.9   | 16.3    | 13.0   | 14.0   | 11.8    | 11.7    | 11.4    | 13.7   | 15.2    | 31.0    |         | 15.1    | 12.0    |
| AtAGP26 | 18.5   | 22.6   | 20.0   | 17.7   | 16.6   | 24.4    | 16.2   | 15.8   | 15.7    | 16.8    | 13.9    | 14.3   | 15.6    | 19.8    | 15.1    |         | 13.0    |
| AtAGP51 | 13.9   | 18.8   | 17.4   | 15.2   | 12.4   | 15.0    | 14.9   | 9.6    | 15.7    | 15.0    | 14.1    | 16.2   | 17.6    | 14.0    | 12.0    | 13.0    |         |

**B**

|         | AtEXT15 | AtEXT18 | AtEXT11 | AtEXT16 | AtEXT9 | AtEXT2 | AtEXT10 | AtEXT7 | AtEXT13 | AtEXT8 | AtEXT17 | AtEXT22 | AtEXT20 | AtEXT21 | AtEXT35 | AtEXT1 | AtEXT3 | AtLRX1 |
|---------|---------|---------|---------|---------|--------|--------|---------|--------|---------|--------|---------|---------|---------|---------|---------|--------|--------|--------|
| AtEXT15 |         | 56.1    | 50.1    | 43.6    | 24.5   | 35.4   | 25.7    | 47.0   | 55.7    | 39.1   | 27.5    | 28.6    | 30.1    | 30.2    | 15.6    | 20.3   | 31.5   | 17.0   |
| AtEXT18 | 56.1    |         | 62.2    | 53.6    | 31.8   | 47.1   | 34.1    | 57.9   | 71.4    | 32.5   | 34.1    | 34.9    | 39.9    | 39.8    | 13.6    | 21.0   | 38.0   | 22.6   |
| AtEXT11 | 50.1    | 62.2    |         | 84.0    | 55.2   | 67.3   | 59.0    | 81.5   | 75.5    | 28.0   | 39.3    | 30.3    | 45.5    | 46.0    | 11.5    | 20.0   | 36.3   | 24.2   |
| AtEXT16 | 43.6    | 53.6    | 84.0    |         | 54.8   | 72.1   | 56.3    | 84.2   | 63.7    | 25.9   | 38.6    | 26.1    | 49.1    | 49.1    | 10.7    | 18.6   | 34.2   | 25.6   |
| AtEXT9  | 24.5    | 31.8    | 55.2    | 54.8    |        | 61.7   | 84.2    | 49.9   | 37.8    | 19.0   | 24.9    | 17.0    | 36.5    | 36.2    | 8.5     | 14.8   | 25.4   | 21.6   |
| AtEXT2  | 35.4    | 47.1    | 67.3    | 72.1    | 61.7   |        | 68.7    | 73.7   | 56.5    | 22.9   | 35.9    | 24.7    | 44.8    | 44.0    | 10.2    | 17.5   | 30.4   | 23.5   |
| AtEXT10 | 25.7    | 34.1    | 59.0    | 56.3    | 84.2   | 68.7   |         | 53.4   | 40.4    | 20.6   | 26.3    | 18.1    | 39.9    | 39.2    | 9.2     | 15.9   | 27.4   | 22.2   |
| AtEXT7  | 47.0    | 57.9    | 81.5    | 84.2    | 49.9   | 73.7   | 53.4    |        | 72.2    | 26.3   | 43.3    | 29.1    | 51.1    | 50.7    | 10.7    | 18.8   | 34.9   | 25.8   |
| AtEXT13 | 55.7    | 71.4    | 75.5    | 63.7    | 37.8   | 56.5   | 40.4    | 72.2   |         | 33.3   | 38.1    | 37.0    | 44.2    | 43.7    | 13.9    | 21.8   | 40.4   | 23.8   |
| AtEXT8  | 39.1    | 32.5    | 28.0    | 25.9    | 19.0   | 22.9   | 20.6    | 26.3   | 33.3    |        | 24.0    | 30.4    | 27.3    | 27.8    | 22.9    | 19.8   | 29.1   | 15.3   |
| AtEXT17 | 27.5    | 34.1    | 39.3    | 38.6    | 24.9   | 35.9   | 26.3    | 43.3   | 38.1    | 24.0   |         | 34.5    | 57.7    | 59.3    | 11.6    | 19.0   | 32.7   | 19.3   |
| AtEXT22 | 28.6    | 34.9    | 30.3    | 26.1    | 17.0   | 24.7   | 18.1    | 29.1   | 37.0    | 30.4   | 34.5    |         | 47.0    | 43.3    | 15.1    | 19.2   | 30.2   | 17.9   |
| AtEXT20 | 30.1    | 39.9    | 45.5    | 49.1    | 36.5   | 44.8   | 39.9    | 51.1   | 44.2    | 27.3   | 57.7    | 47.0    |         | 81.3    | 11.4    | 20.0   | 35.7   | 25.4   |
| AtEXT21 | 30.2    | 39.8    | 46.0    | 49.1    | 36.2   | 44.0   | 39.2    | 50.7   | 43.7    | 27.8   | 59.3    | 43.3    | 81.3    |         | 12.3    | 20.3   | 33.7   | 24.0   |
| AtEXT35 | 15.6    | 13.6    | 11.5    | 10.7    | 8.5    | 10.2   | 9.2     | 10.7   | 13.9    | 22.9   | 11.6    | 15.1    | 11.4    | 12.3    |         | 12.5   | 12.7   | 6.3    |
| AtEXT1  | 20.3    | 21.0    | 20.0    | 18.6    | 14.8   | 17.5   | 15.9    | 18.8   | 21.8    | 19.8   | 19.0    | 19.2    | 20.0    | 20.3    | 12.5    |        | 38.8   | 11.5   |
| AtEXT3  | 31.5    | 38.0    | 36.3    | 34.2    | 25.4   | 30.4   | 27.4    | 34.9   | 40.4    | 29.1   | 32.7    | 30.2    | 35.7    | 33.7    | 12.7    | 38.8   |        | 21.2   |
| AtLRX1  | 17.0    | 22.6    | 24.2    | 25.6    | 21.6   | 23.5   | 22.2    | 25.8   | 23.8    | 15.3   | 19.3    | 17.9    | 25.4    | 24.0    | 6.3     | 11.5   | 21.2   |        |

**Supplemental Fig. S1. Identity of GPI-AGPs (A) and CL-EXTs (B)** Percent identity (distance matrices) were generated in Geneious from a MUSCLE alignment (MEGA) using default parameters. Order of sequences was manually changed to match the ML trees **Fig. 2C,D**. Shading shows 0-15% identity (red), 25-50% identity (yellow), 50-100% identity (green).
