# Supplementary material
Source: PubMed Central journal article supplement (PMC5462032)
Supplement: supp_pp.17.00294_00294Johnson1_Supp_Figure_S3.pdf [file supp_pp.17.00294_00294Johnson1_Supp_Figure_S3.pdf]

>LOC\_Os05g16220.1 | PACid:24154241  
MAPAGVALALAAAVCFLLVAPASARRPADLPPQAVLLLPEPVDYREAAAEPLLPKPVADANADASDADLTAAALA VPDEEERGEARARASLLCFVFR  
>LOC\_Os05g27360.1 | PACid:24154529  
MAALALAAALALTVALARARRRRRLPPARVRRPCPLPLAARPLAVTSGHEAAP SAAARLRAVADGGPHAGRASRRRAARGAGVADAS SP SASSASRRPPQ SPPFQAVAGWGRQIRRP SGRIWPYLAKSGRRWWRPSLVALAAGSSLP SPPTPPHCQR  
>LOC\_Os05g32150.1 | PACid:24150833  
MQEEAASSSSSSASPVMDGGKAMAVLLAVAAA VLLLPLVLSL LLLLPLVLLL VVSLA FFPAAGSDGVVAAA AVAGTYQPPPPPPARS SPPFSSSSSSSRQL  
>LOC\_Os06g08190.1 | PACid:24143037  
MHLRPLLSLAWLLVAALFLLQSSPTSS SS SPPPPPPPPPSGAAAGEDNGGSSAIWAGVVAADTGGGGKEKAAQRSLRRVGLHR TPPPPTSNDGGIESI SPPPPPEQDQFFSSTGYPTRPPPS  
>LOC\_Os06g29460.2 | PACid:24140874  
MPRSCLRPLPILSAAAAAAGRASPSWRAGRSRRSGTAAEEEEEAAGVMARGCREGSRSTSPRGNTSCGIRRWITPSSRRPAS SPPTSSRSARHGEPHQAAPP GRRQGRRRYPAWF SRSTAAWFQFNRFLKYITSLTNTTILGPANFTLFPYSSI  
>LOC\_Os07g13500.1 | PACid:24111120  
MSPSLTLLLFLSVVATVGA DDVRQVLHEPLFPIEW TPSPSSDFSSDPPTATATLVDNS SPRLLPALPNTIAADVLSSRRPDPQASCSSGGMPKAAIVVASVAVAVALLAIVVAFLLTSRLARHPAAARPRAC  
>LOC\_Os07g18070.1 | PACid:24110271  
MARSLLLLVLLASVLA AAVSASSSEESSKPSILIPVAD TPLGSEYEGAD GP IADDALEDMEAAPLGSP IGTMTTEPEPELPAN APPSSAGATASS TPTLLAAAVMAAVAGVFAF  
>LOC\_Os07g39640.1 | PACid:24110061  
MARHTVVISLLTSAVAGAS QPPATASQGTWTGLAGEQEMEGAATASSAAPVASLFPGLPPLPPLPALPALPPLPPLPPLPPLP SPGTTTTRRPP SPPFTECLTSLVELLPCVDYLTNDATA PFGACCDGFRSLVGSALICLCHGINGDMS  
RMSRIPDPVRMVL PAMCSTMLPPQSLFCYCTETVPPLVP  
>LOC\_Os07g40830.1 | PACid:24108971  
MSSSSSSSALLMAALLSCGAMGSTA RHLEEK AP HFPA VPELPHPELPELKPPELPPPELPRPV VPELPHPA VPELPLPKPELPPHPV VPEMLPHV VPELPHYA VPEGPKHGLPPKPELPLPTAELPPEHEVHDPEPETKQP  
>LOC\_Os08g37300.1 | PACid:24097509  
MASSGCHLLVLLAFSAFHCSYARHLLDTAAAAA AP EAP AQPSMPTVP TTLPPIPSIPA VPKLT VPPMPS VP IPKVTIPPTAAGTIPSLPIPAITTTIPTIPT VPTLPPMPSIPTTIPSIPTTIPTTIPTIPGFQMPPPIFMS SPPKTTSP  
>LOC\_Os09g16250.1 | PACid:24138570  
MSSSLSHLPPFLSLLTLWPPNTSSA TSNAACHDNFVSVL APPHPSHVFCVALFGAIASSIARRFTA AVAP STSTVRQPPRKTGTTTAAIAAMPRTLPLARIKEVDSTL TP KQVIAW  
>LOC\_Os09g16280.1 | PACid:24137303  
MSISPRFLAVAAVLGAMYSAAATVAADTPGGSCPYCLPPP IAGGAVNSYPPPPAGSSSSSSGGGAGGLFGGTYPPPPGVMPGAF APPFGGG PPGPAPP PNPILPWF PW QHNNPITGSTTAAAVGR TP ASMVTTVLLPLFLVALLRVL  
>LOC\_Os09g19210.1 | PACid:24138719  
MWPALRPMSLTRLTPFAALS TSTCPAAIACCAASTAVWNPNDRLM TPMSLSAVFGIAATAEPRHAPRIVPSSPTDWWLASSAEERKPGCTREEEEEVRLTRGSHLS  
>LOC\_Os11g04050.1 | PACid:24158818  
MAAVRILAGFRQFALPVVLAIA RRRPKPSRARRRSLQQEGEGGERRRRLRTAGSAAATAS SPTRSSAPRPPPSAAAP AASAP RLPSSAAASA SP SELRAEAA APACR  
>LOC\_Os11g06150.1 | PACid:24157183  
MASRTTSTRVEVAIKMSYLVVLAIASLSACRVA TSRSLLVTGGQAA APAPVWSFGALPPLIEPAVVEPPTAVAP VHAVAVGE APPPLKEESGSHVKKSKHKDEER APPPKKHEK APPKSKHGRHAPPDQPEL SPPAPPESYTPDAPPAP EAA SPHH  
GGGENPAWPRGNNQWPLPFPNQPT DEWPHPGNKWPLPFFHPPP TPAWPHPGNKWPLPFP SHPPP TPAWQPGNKWPLPFP SHPPP TPAWPHGNQWPLPFP FHPMPAWPHGNQWPLPFP HGSD VPPATKKITKEEVHE  
>LOC\_Os11g10880.1 | PACid:24155749  
MERCFLLLLATGIAAGEQPPRRTAVADHPAIVGTTTA AP CDPLCISGAAAGGA TP EAMAAASA AVAMAGNESESALL TP RQLDRPDSSGLPTTHQSWI VYGLPT TPYPYSK APPASELVRATTA AA AVVSTVLLVAAAAR  
>LOC\_Os11g37320.1 | PACid:24157445  
MARSKLPLLLVAVVTA AVSSAWLP SPASAASDAAGGEYCRDSLGLLACRDFMFGAAAA SPACCAAYSAAFADDPFCLCYIADGVYGRSTGYDVNVTHALEIPVSCGLATPPIELCNTQGLVLPPEYFSP QPPSAGKLAESPAA TPAQSP TAAPSLPQ  
APKPS SPPFTSPSP LPPPPPPPTSHGARGATMIGTVAAAVAMTLLALLS  
>LOC\_Os12g06280.1 | PACid:24147000  
MEERKWRSTSSWPPMLPVIMMAMAILAVSFNGAAA QPPPDNTVLCVSKGCTCPTVCS SPPPPASGNYNPVL SPPKGTGSGVSGSSS SP SAPLAKGGQPGGSNY YFFTSGGSSHGCAAALLPPLVSLAVAALSQ

## Selaginella moellendorffii

### Class 1: GPI-AGPs - 3

>440674 | PACid:15406499  
MAQIFFLAVAAALLVSPQACS ENEYVVRPGMKLEVSFADVPAAPPTGSLAPPPVPMAPP TPTPAATPPVATPAPEVEAPVPSAA SPPAPPTAPT GGSANAPA SPPGTT S SALAIVSPISIVLGSIALLGLF  
>443341 | PACid:15412991  
MAFLATAAAAAAVITPFFAIVNVDA HQKMSSSHGIIGNAMDESSGTVVWKVEKQGLVDYFKCASSTSRSSNAGHCKKHRI IQRLLAESPKSPKSGSGTKATSPSSTPALATAPSTRASAPSTGTVPAPVASPVVSPVVTVPVTAPVTSPPVATSEVATFPV  
ITAPPVATPVVAPPVTTPVVAPPVATPVTSPPLATP VASPLATPVTAPVVSPPLATPVTAPVIAFPVATP VSTPVAAFPVVTVAAPVTPALAPVA VVTAPVSPVAPVAAPVIPPAPVS SPVVAPAPSPKKHRSFAPAPVPLGFPAPPLSPTSPA  
TSAEGDFAPITTPS GALRSMPGSLLLMAFSLLGVA  
>445643 | PACid:15421034  
MAFGRPQLLALALLAHTCICEEFVHVHPGKGLNI ILA TPAGAPSGSAA GPAATVPPPTVPAAVAAPPSVPPVVAATPPTVPPVATP PPAPVATP PPAAPAPVVL TPVAAATP VVAAPT VLTTPVATP VVTP TASPAASPPAPPTGSSP  
APGASDLAPQSPSSAISIVASAASVLVASSLAAALF

### Class 2: CL-EXTs - 19

>Selmo\_229952 | PACid:15414583









>Pp1s38\_64V6.1|PACid:18058026  
MAEQLWFAFVLLVMICSTGWTVH ARPLPEELPTLPEPTLGKLLAWQDPSTTP NLPWNPPPPPLPFLRN SPPPLTFPWNTPSPPNPVTPWTP WNTQLPPPSP LSTTPSLPI SVTPWYTP SPPSPLSITLAPP SIVTP WNPWSAM SPPPSPTPTLSP  
MSWTQPWQTPPE PVDSTTPSFPGNKPP SPPSE MWTNPLF TPPP PFDTPD SPPPP WNRPVVI TP SPPSP TTS SPPPSLFTLFAS SPPPPA QIFPWT SPPPV VGP IFPWTP SPPK VCP SLPFPGLPPG P LLLPSGIQFTFNFTQAWLPQAGVKVWQ  
SLITMELSLQLLVEAVVKPIMVLIQDFDPDPGKLGKWRNVLEDSKLAAKVGTCTTSSNESGYPERGMVIVQ TP INNTTSSNAVAWFTVLFNGWSQT TP FHATLDS TP GTFGGFVTDSTLPDLNFTCLHPSSLARRANRQGLHYVMG  
>Pp1s4\_236V6.5|PACid:18046836  
MAAKGGHGFOYLNIIITVLLSSLLIFDSANA DWYGLITAPVY SPQAAP ETIPPTWAF YTSPEAPTP YVAPANSPYEAPAGPAYTPAP DVGGFVSP FYEYVE SPAF VYTP ELAP TYL TPVPTPAYEPIYAPVPTPVPAL VSPPEL SPAPVF SVYAF EPSPVPS  
FAPDAPVDSAEALTDSSATMKFSRTWRLLATTTTSSLIATLIL  
>Pp1s405\_12V6.1|PACid:18065347  
MAITMRLSAVMAVLLVLCVALVQQAHA GRQLMSVSP SSAPATSPGP AAVAFPI TVAF VGAP EGAP EGAPVA SPADAI FVYGVPPAGAPAP VALPPAGVGY  
>Pp1s469\_11V6.1|PACid:18055055  
MKSVMQAMVLLLLAALLECQVHSEA GRTMLTVGSEKTLSSLLPSC SPPPAFVDVPTPTPTD TTSSTHDTYTPPTPTTSEPSPVYS SPPADGY  
>Pp1s469\_14V6.1|PACid:18055048  
MAKTSRQAMSTQLILVAALLSCCACIVNTEA RVLLTSSGLGSLIPSLTLCPPPPSTDPATPYTP SYSPV VASDP SPVTPTPVYS SPPYSPGTPSGGSP VTPSP SYS SPPYSPTP SSSSFTTPS SPTYS SPPY SPAPS SPSPTAF SGPSFS SPTYS SPPYSP  
TPSGS SPSPTYS SPPYSPTP SSSSPTTPS SPSYS SPPYSPTPSDP SPTSP SPTYS SPPY SPTSPGSPPTPS SPTYS SPPYSPTPSGSPPTT SPSYS SPPYSPTP SGGSP SGGSP SPSPPAGGY  
>Pp1s49\_2V6.1|PACid:18041256  
MAPTAVASKAGGIPYAVTVLALVASTLSVGADA RSRFRPGHDHQHSPAPPGYNEP SPSPSPEHGDGFVGA AHFPHAPESFYE GAHAPDSFSEDPGHTAD SPNPLDVPAF YSPGIGY  
>Pp1s6\_370V6.1|PACid:18038869  
MAITLRVCGVMAVLLVFTMSVHTEA ARNFLFPEA TP SYAF SYVPE TSP IPIPIAYPLVVD TP ELAPEGAPETSP IPIPIA TELVAD TPELAPEGAP VSLPLVAVPAFAPS  
>Pp1s66\_120V6.1|PACid:18038303  
MTGGNGSRSSRPSLLLIFMLIPVFA ATAHDVHGDDRSSLRQSP RAPDSAHEISGEPGTNKY GKMTFDEALHHGSDSDEPTTCTCTCYRDVPE SPKTLQSS MHRDR SPPAFYRY SPSPAYS TPAPPTGSTTSP VTFNS SPPPTPY DIPAYNKP SPPVV  
AAPETFVPPP PPSPVY  
>Pp1s72\_157V6.1|PACid:18040642  
MAKQSQQLVAALA AVVVLCAVMAAHVDA QSIP APAP YMRGY APSQAP AAVHKGVPEYAP SLAPSNA PAS AP EGS PMSAP VVA SP AYAS SP GFQGPSADAPGPMSEGEF

### Class 19: Shared Bias, high AGP - 3

>Pp1s336\_50V6.1|PACid:18071388  
MKGQALVLIQTLMLVACSCSA ARI FVEENRATRHMFKFNGLS PTEKPKLPPLPTLPPNPELTLPPQPKLPSFGKKCPPP SP VYL SPPY SPSPVYT SPPYSSSHVYR SPP  
>Pp1s8\_132V6.1|PACid:18074183  
MTAAPAMTVALLLVALLSCALPSEA GRALLTLGSQKNLKSLLPGC SPPPAFVDPTP SY SPP TY TPE SPPY TP SY SPS VYL SPPVDQ SPSY SPGSP SY SPP STGYO TPTTY SPPLYL SPP TY SPSP VYS SPPY SPSP VYS SPSP VYK SPP VYQ SPP AGGY  
>Pp1s72\_283V6.1|PACid:18040636  
MRRFQTLTLLAALLLVVVCSCSA ARI LEENHA AP QMKFKKGMHHP AP KLSLPLPSIP SFGKKCPPP APPVVE SPP YV SPPSP VYM SPPY SPS VYK SPPSP Y

### Class 24: <15% motif HRGP - 1

>Pp1s316\_24V6.1|PACid:18051034  
MILFFLVAPHTLA PNSTLCLLP APP RTDVELPPNCAF NRRRTDAELPPNYRRTDAESAAATL SPL TLPPAAAARRCPPLLPCRPATCCRHFIAVLLP

## Volvox carteri

### Class 1: GPI-AGPs - 1

>Vocar20000464m|PACid:23131425  
MFTMRSSSPRAAQVVRMVALLCGMFATSI AP PASPGYGGIQLKLVG AP SYPPPPPP SPPSP QASSAV APPLALIPAAIL SP LS SPP VYPGSQPEILAP SP KAQLLGS SPP FFLDASTLQRPPSLALPPSQPSVGSNS SPPGYDGSS VP PTSNLI RN  
VTNATVVLRSQTS SGARVAAPTIAVLVCVLLGLIATSQAAYAL

### Class 4: Non GPI-AGPs - 5

>Vocar20001955m|PACid:23138146  
MRCLAVLVLLVLOAGVGLG STDGELRGAGENLIVNADSTS IKPTQPSSLLPPPPPPPPPPPPRKFYSF GLVWCYFNFQWPDMPEMPP SPAQPS SPAGFAGRDTAAFE SPSQPP SP RKTATKAVQQK APSTKPPP SKMRPPRPLP SPPPPSPSP SPK  
PPSPSR SPPRPRSSQPTSRPATG SPAP KASRLLRL  
>Vocar20005778m|PACid:23135235  
MAFSGHGMIVLCLVRT LEIY APVGT NAVGTSGVEPPRPKEPTAY IRAQVPEP AF YAVANDTRAGFM SPPRRAGEAAGGSVVKDVGTSYLI SARKPKRPA SELHDQEP PPPFAELSR LPSSSNYQHFT PAAPRE TP L DSSDYRS SKRHGASV GPHT  
GFWLLKPNAGARTTG APP SLPPRNPLQSTDSFRCGI TP FSSRLGMGSSGRPPV ASSTGGVGGEGAGAGSL VP AAGSTASSDGGTGGDGGAGS ILQDAGRMQWRVRLSVST IRTGARGGTSVQPRSAS IRRPQKRWYEG GDDDDDDVLEPGAAGAG  
NGMQASTLGVA TPA AVSGLFGKAAATLALATA TPPP PAVT TTA SPPAP L P CFSFVEAGSSGGAENG TP SAGLLSRTAGSAADASKPVE APAAA APPVIAARTGTGEGNCT AP SGAA AP SAPAGGSA VP LGFSFGNAVA AP AA TP TSTTGAGG AP AEPAASSA  
PAGGASTAAATA APAP AGSAVV TPAF TAAGFSCGSGTSAAGLSTGTAGATGVAP SISI AP AP SFSGFGAS AP AP ASANLLASASALKPAETSTSTVTGGTGSAGTDAAVKPAASTGFSFGT APATFP GFSGNP TAAQLAAIETSTQPAAGITTRGF  
SSGGAGTSTTTISST AP ASATGTQPANPFAAASNSL TP TQPFTFGTSSTA VP AAAASGMTRGAAGAEDTTAATAVGAPT AP AFGATTGGSAGGVSFSFGTASSASASSGDRA TP TFGVSTASTT APAT AP SLPTFGFGGGGATAASAASAAASSAMPAL



MPKTI M V P E A R A I V P A I I S L L A F L S A V Y G Y P K Y W W D P S Q G V M P E G N F C H A H P E R A Y P E L E V D G F W L E S P H G A P R L D P D I T F E F R N A A G D L V S S L C P G A S Y A L K G S F P L P S L V L L S S S E G R F T S P A T T P G C P N R V D W G G S I S T R A A M L F N A T Y A V P C N P S A D I N  
FRVTSASRGYPGTWAQASVTLTVDSCAAASCPKSDIPP S P E A T P S P P L T S I P P S N S K P V K K K P P P P K R K P P L P R K W K P P M K L T P S P S P A P A A  
>Vocar20009525m | PACid: 23124936  
M A S E L G A A M A V A M A A A T A V A A T T A A A V A T A A A A A A E T V A A A A T A M T A T I A A A L P A A M G M P M G A V M A A A M R A M P A M T Q R A K P A M T Q R A M P A M T Q R A K P A M T L R A M P A M T L R A M L E M T Q R A K P A M T Q R A K P A M T Q R A K P A M T L R A M P A M T Q R A K P A  
M T Q R A M P A M T L R A M P A M T Q R A K P V M T L R A M P A M T Q R A K P A M T Q R A M P A M T L R A M P A M T Q R A K P A M T L R A M P A M T Q R A K P A M T L R A M P A M T Q R A K P V M T L R A M P A M T Q R A M P A M T Q R A K P A M T L R A M P A M T Q R A M P A M T L R A M P A M T Q R A M P A M T L R A M P A M T Q R A K P A M T Q R A M P A M T Q R A K P A M T L R A M P A M T Q R A M P A M T Q R A M P A M T Q R A K P A M T Q R A M P A M T Q R A K P A M T L R A M P A M T Q R A M P A M T  
Q R A M P A M T L R A M P A M T Q R A M P A M T L R A M P A M T Q R A K P V M T L R A M P A M T Q R A K P A M T Q R A M P A M T Q R A M P A M T Q R A M P A M T Q A A L P P A E S G A P P V L R R T R E G A G G R P G G R L R S G P V Q R D C R R R Q R I Q  
>Vocar20009596m | PACid: 23125737  
M T K P S A K L I V V S L I L A R T A H F T F I I P P I R P K W S N V R G L V R A T K L N G A T Q Q Q H T T G T P P E L E P D Q P V M R P V A A K A R M E C C S S F C N A S R D S S F T S A R A L S M A T A P Q P A K R S A T C S S W L T A T  
>Vocar20011650m | PACid: 23124561  
M R A R I A F L L A V A L Q L Q S H L L W R T G A R K E S P P P L E E L W P P E D V F P P P P K R Q S T A E S S T S Q G A A A A A A A A A T I P S P K V K R R T I T L L R E S G N P P T A A D A T A A S A S A S A S T P T S S A P S A G T T R A S G R A T A S V R I P R P P S A K S P S Q R P P N S P P R P P P P Q R P A P S P  
P S P A P R F P S P G P P P P S P P E D L L V F S R K F A H V T R T A D G P F P C A W V T V D G A D F R A R R F V F P P T W D P V V V D I P G F V Y T V E A A G M E R T L P V A V C T S P E P C A S L Q A V E S S A G L S T L E L L L P P T Q N T P T S P S S A S S N K N R L Q L Q S A I Y P H G I F V L A P S D G S Y N S Y S V E  
V C T R V P K A V A A C P L S F G V M S I L R P A D A M P T E A D P Y G P Y G A V L P Q T T W S N P L A Q L A A A R A A A E E S I P A V I T S G C A P P P G L D E K N K A V V F S W G W D F S S L P P S L A A T G F V A V Y G D Y P V R Q M W S G S Y R L Q Y G G P A G V R F G V I L Q L G V E D D G S D V G T R T R T E A A A V R  
E F V G T A D V P T D E G R L P D S P H P D L A C C M W H K S A H G V A F C F R R D S E K R W L S K V

**Supplemental Fig. S3. Representation of sequences identified by MAAB in Phytozome with features highlighted.** HRGP sequences identified in *Arabidopsis thaliana*, *Oryza sativa*, *Selaginella moellendorffii*, *Physcomitrella patens* and *Volvox carteri* proteomes are shown by MAAB class. Motifs used for classification of sequences are highlighted differently for the broad HRGP families of AGPs, EXTs and PRPs as follows: the motifs used for AGPs and highlighted blue are: [ASVTG]P, [ASVTG]PP, [AVTG]PPP, for EXTs: SP<sub>3</sub>, SP<sub>4</sub>, SP<sub>5</sub> are highlighted red and [FY]XY, KHY, VY[HKDE], VxY, YY highlighted dark blue, and for PRPs: PPV[QK], PPVx[KT] and KKPCPP are highlighted olive. The total number of sequences identified in each class is shown after a hyphen (-).
