# Supplementary material
Source: PubMed Central journal article supplement (PMC5462032)
Supplement: supp_pp.17.00294_00294Johnson1_Supp_Figure_S4.pdf [file supp_pp.17.00294_00294Johnson1_Supp_Figure_S4.pdf]

**A** Class 1: GPI-AGPs (total 5754)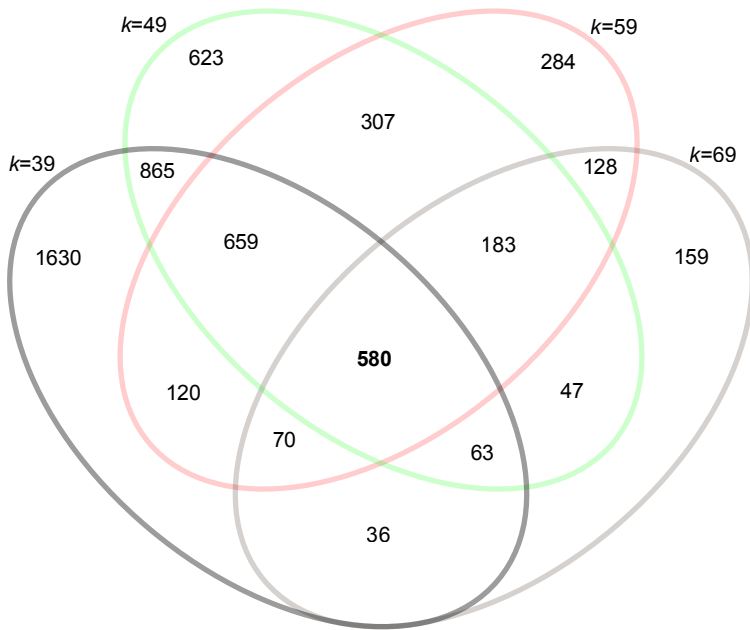**B** Class 2: CL-EXTs (total 3193)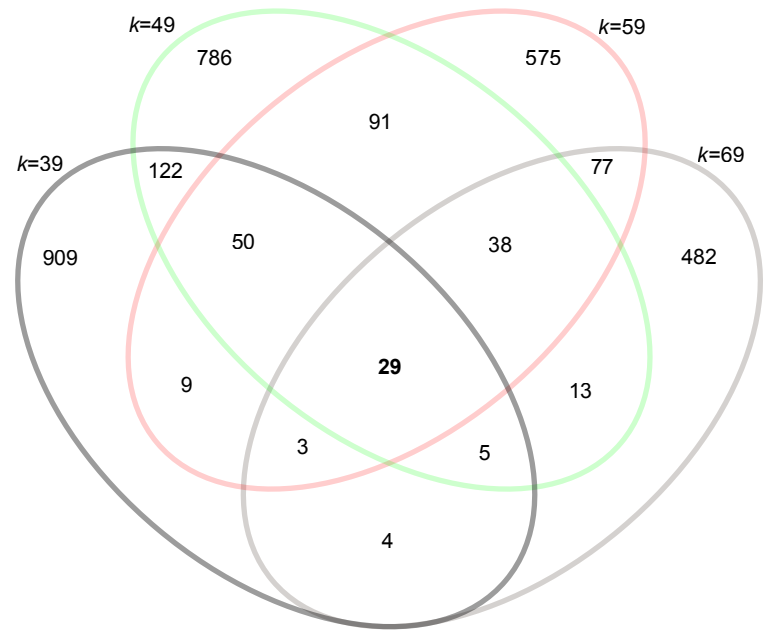**C** Class 3: PRPs (total 455)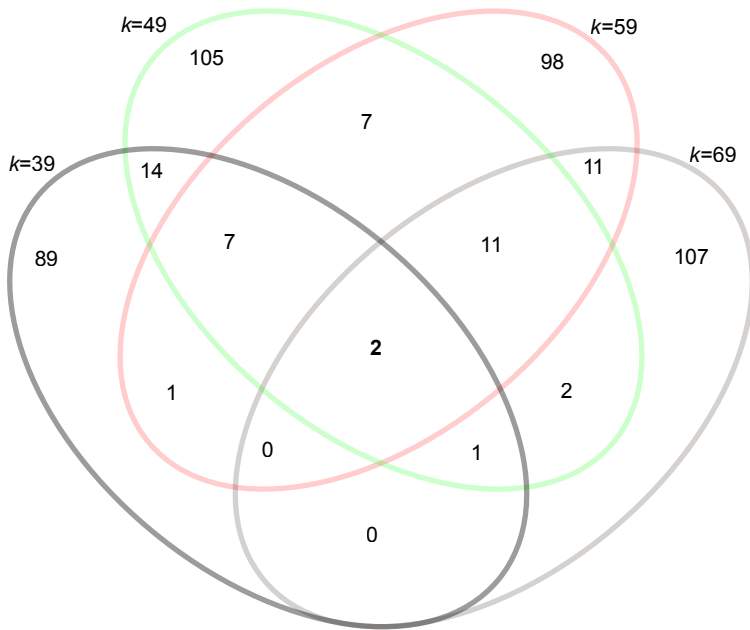**D** Class 4: Non-GPI-AGPs (total 28649)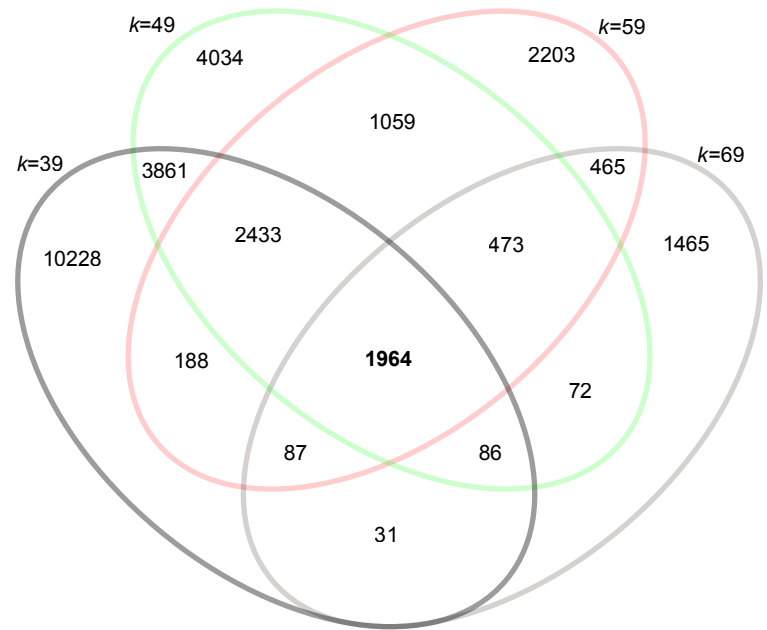

**Supplemental Fig. S4. Venn diagram of the number of HRGPs reported in the four major HRGP classes using four k-mer sizes.** The number of class 1: GPI-AGPs (A), class 2: CL-EXTs (B), class 3: PRPs (C) and class 4: non-GPI-AGPs (D) using four k-mer-sizes (39 (dark grey), 49 (green), 59 (pink), 69 (light grey) are shown; see **Methods**). The number of sequences found with all four sizes of k is in bold. Each k-mer produced a distinct set of sequences but many sequences were identified with two or more k. No single assembly parameter was best for any given HRGP class (1 to 4).
