# Supplementary material
Source: PubMed Central journal article supplement (PMC5462032)
Supplement: supp_pp.17.00294_00294Johnson1_SuppTable_S3.pdf [file supp_pp.17.00294_00294Johnson1_SuppTable_S3.pdf]

**Supplemental Table S3.** Comparison of MAAB and BIO OHIO v2/manual curation classification of *Populus* AGPs, EXTs and PRPs<sup>a</sup>

| Showalter et al. (2016) (Tables 2, 3 & 4) |          |                    |        |                     |                | Eliminated <sup>c</sup> |                 |              |              |            |                           | MAAB Class or PFAM ID        |
|-------------------------------------------|----------|--------------------|--------|---------------------|----------------|-------------------------|-----------------|--------------|--------------|------------|---------------------------|------------------------------|
| Locus                                     | Name     | Class <sup>b</sup> | Length | Signal peptide (ER) | GPI            | 1a<br>95% ID            | 1b<br>≥45% bias | 1c<br>≥90 aa | 1d<br>≥10% P | 1e<br>PFAM | 1f<br>Signal peptide (ER) |                              |
| Potri.017G050200                          | PtAGP1C  | Classical AGP      | 137    | Y                   | Y              |                         |                 |              |              |            |                           | 1                            |
| Potri.017G050300                          | PtAGP2C  | Classical AGP      | 133    | Y                   | Y              |                         |                 |              |              |            |                           | 1                            |
| Potri.005G161100                          | PtAGP3C  | Classical AGP      | 161    | Y                   | N              |                         |                 |              |              |            |                           | 4                            |
| Potri.014G135100                          | PtAGP4C  | Classical AGP      | 140    | Y                   | Y              |                         |                 |              |              |            |                           | 1                            |
| Potri.001G339700                          | PtAGP5C  | Classical AGP      | 144    | Y                   | Y              |                         |                 |              |              |            |                           | 1                            |
| Potri.001G259700                          | PtAGP6C  | Classical AGP      | 197    | Y                   | N              | Y                       |                 |              |              |            |                           | 97% ID to Potri.001G259500   |
| Potri.001G310300                          | PtAGP7C  | Classical AGP      | 126    | Y                   | Y              |                         |                 |              |              |            |                           | 1                            |
| Potri.001G367600                          | PtAGP8C  | Classical AGP      | 265    | Y                   | Y              |                         |                 |              |              |            |                           | 1                            |
| Potri.001G310400                          | PtAGP9C  | Classical AGP      | 137    | Y                   | Y              |                         |                 |              |              |            |                           | 1                            |
| Potri.017G047500                          | PtAGP10C | Classical AGP      | 207    | Y                   | Y <sup>d</sup> |                         |                 |              |              |            |                           | 4                            |
| Potri.002G207500                          | PtAGP47C | Classical AGP      | 141    | Y                   | N              |                         |                 |              |              |            |                           | 4                            |
| Potri.010G031700                          | PtAGP48C | Classical AGP      | 169    | Y*                  | N              |                         | N               |              |              |            | N                         | -                            |
| Potri.008G182400                          | PtAGP50C | Classical AGP      | 101    | Y                   | Y              |                         |                 |              | N            |            |                           | -                            |
| Potri.015G093700                          | PtAGP51C | Classical AGP      | 115    | Y                   | Y              |                         |                 |              | N            |            |                           | -                            |
| Potri.012G095900                          | PtAGP52C | Classical AGP      | 115    | Y                   | Y              |                         |                 |              | N            |            |                           | -                            |
| Potri.005G169000                          | PtAGP64C | Classical AGP      | 216    | Y                   | N              |                         |                 |              |              | Y          |                           | LTP_2; PF14368.4             |
| Potri.008G155200                          | PtAGP65C | Classical AGP      | 219    | Y*                  | Y              |                         |                 |              |              | Y          | N                         | LTP_2; PF14368.4             |
| Potri.005G212000                          | PtAGP66C | Classical AGP      | 207    | Y                   | Y              |                         |                 |              |              | Y          |                           | LTP_2; PF14368.4             |
| Potri.002G050200                          | PtAGP67C | Classical AGP      | 205    | Y                   | N              |                         |                 |              |              | Y          |                           | LTP_2; PF14368.4             |
| Potri.010G085400                          | PtAGP68C | Classical AGP      | 170    | Y                   | Y              |                         | N               |              |              | Y          |                           | LTP_2; PF14368.4             |
| Potri.008G155100                          | PtAGP69C | Classical AGP      | 170    | Y                   | Y              |                         | N               |              |              | Y          |                           | LTP_2; PF14368.4             |
| Potri.009G092300                          | PtAGP11K | Lys-Rich AGP       | 196    | Y                   | Y <sup>d</sup> |                         |                 |              |              |            |                           | 4                            |
| Potri.010G132500                          | PtAGP12K | Lys-Rich AGP       | 241    | Y                   | N              |                         |                 |              |              |            |                           | 4                            |
| Potri.007G051600                          | PtAGP13K | Lys-Rich AGP       | 204    | Y                   | Y              |                         |                 |              |              |            |                           | 1                            |
| Potri.005G144900                          | PtAGP14K | Lys-Rich AGP       | 208    | Y                   | Y              |                         |                 |              |              |            |                           | 1                            |
| Potri.008G111000                          | PtAGP15K | Lys-Rich AGP       | 276    | Y                   | Y              |                         |                 |              |              |            |                           | 1                            |
| Potri.008G195700                          | PtAGP49K | Lys-Rich AGP       | 194    | Y                   | N              |                         |                 |              |              |            |                           | 4                            |
| Potri.018G050100                          | PtEXT1   | Classical          | 190    | Y                   | N              |                         |                 |              |              |            |                           | 2                            |
| Potri.001G019700                          | PtEXT2   | Classical          | 213    | Y                   | N              |                         |                 |              |              |            |                           | 2                            |
| Potri.001G122100                          | PtEXT3   | Classical          | 238    | Y                   | N              |                         |                 |              |              |            |                           | 21                           |
| Potri.001G259600                          | PtEXT4   | Classical          | 500    | Y <sup>e</sup>      | N              |                         |                 |              |              |            | N                         | -                            |
| Potri.001G020100                          | PtEXT5   | Classical          | 257    | Y                   | N              | Y                       |                 |              |              |            |                           | 95.2% ID to Potri.001G019900 |
| Potri.001G019900                          | PtEXT6   | Classical          | 259    | Y*                  | N              |                         |                 |              |              |            |                           | 2                            |
| Potri.001G260200                          | PtEXT7   | Classical          | 222    | Y                   | N              |                         |                 |              |              |            |                           | 11                           |
| Potri.001G020000                          | PtEXT8   | Classical          | 267    | Y*                  | N              | Y                       |                 |              |              |            |                           | 95.4% ID to Potri.001G019900 |
| Potri.010G001200                          | PtEXT9   | Short EXT          | 174    | Y                   | Y              |                         |                 |              |              |            |                           | 20                           |
| Potri.010G113300                          | PtEXT10  | Short EXT          | 131    | Y                   | N              |                         |                 |              |              |            |                           | 4                            |
| Potri.T091000                             | PtEXT11  | Short EXT          | 106    | Y                   | N              |                         |                 |              |              |            |                           | 20                           |
| Potri.013G045700                          | PtEXT12  | Short EXT          | 111    | Y                   | N              |                         |                 |              |              |            |                           | 20                           |
| Potri.003G064900                          | PtEXT13  | Short EXT          | 167    | Y                   | N              |                         |                 |              |              |            |                           | 21                           |
| Potri.006G225400                          | PtEXT14  | Short EXT          | 186    | Y                   | Y              |                         | N               |              |              |            |                           | -                            |
| Potri.002G070100                          | PtEXT15  | Short EXT          | 102    | Y                   | N              |                         | N               |              |              |            |                           | -                            |
| Potri.019G015900                          | PtEXT16  | Short EXT          | 108    | Y                   | N              |                         | N               |              |              |            |                           | -                            |
| Potri.019G015800                          | PtEXT17  | Short EXT          | 107    | Y                   | N              |                         | N               |              |              |            |                           | -                            |
| Potri.019G016000                          | PtEXT18  | Short EXT          | 116    | Y                   | N              |                         | N               |              |              |            |                           | -                            |
| Potri.019G017300                          | PtEXT19  | Short EXT          | 110    | Y*                  | N              |                         | N               |              |              |            |                           | -                            |
| Potri.005G190100                          | PtEXT20  | Short EXT          | 115    | Y                   | N              |                         | N               |              |              |            |                           | -                            |
| Potri.014G124700                          | PtEXT21  | Short EXT          | 168    | Y                   | N              |                         | N               |              |              |            |                           | -                            |
| Potri.T082000                             | PtEXT22  | Short EXT          | 177    | Y*                  | N              |                         |                 |              |              |            |                           | 4                            |
| Potri.008G129100                          | PtEXT23  | Short EXT          | 155    | Y                   | Y              |                         | N               |              |              |            |                           | -                            |
| Potri.008G213600                          | PtEXT24  | Short EXT          | 172    | Y                   | Y              |                         |                 |              |              |            |                           | 5                            |
| Potri.008G125400                          | PtEXT25  | Short EXT          | 80     | Y*                  | N              |                         |                 | N            |              |            |                           | -                            |
| Potri.001G169200                          | PtEXT26  | Short EXT          | 147    | Y                   | N              |                         |                 |              |              |            |                           | 24                           |
| Potri.001G042200                          | PtEXT27  | Short EXT          | 177    | Y                   | N              |                         |                 |              |              |            |                           | 4                            |
| Potri.T179500                             | PtEXT28  | Short EXT          | 176    | Y*                  | N              |                         |                 |              |              |            |                           | 4                            |
| Potri.T101300                             | PtEXT29  | Short EXT          | 151    | Y*                  | N              |                         |                 |              |              |            |                           | 4                            |
| Potri.T139000                             | PtEXT33  | Short EXT          | 107    | Y                   | N              |                         | N               |              |              |            |                           | -                            |
| Potri.004G168600                          | PtPRP1   | PRP                | 554    | Y                   | N              |                         |                 |              |              | Y          |                           | Ole_e_; PF01190.15           |
| Potri.016G015500                          | PtPRP2   | PRP                | 449    | Y                   | N              |                         |                 |              |              | Y          |                           | Hydrophob_seed; PF14547.4    |
| Potri.014G126200                          | PtPRP3   | PRP                | 372    | Y                   | N              |                         |                 |              |              | Y          |                           | Ole_e_; PF01190.15           |
| Potri.014G126500                          | PtPRP4   | PRP                | 366    | Y                   | N              |                         |                 |              |              | Y          |                           | Ole_e_; PF01190.15           |
| Potri.018G126000                          | PtPRP5   | PRP                | 310    | Y*                  | N              |                         |                 |              |              |            |                           | 24                           |
| Potri.009G129900                          | PtPRP6   | PRP                | 283    | Y*                  | N              |                         |                 |              |              | Y          |                           | Ole_e_; PF01190.15           |
| Potri.003G111300                          | PtPRP7   | PRP                | 234    | Y*                  | N              |                         |                 |              |              | Y          |                           | Hydrophob_seed; PF14547.4    |
| Potri.006G008300                          | PtPRP8   | PRP                | 234    | Y                   | N              |                         |                 |              |              |            |                           | 24                           |
| Potri.T162800                             | PtPRP9   | PRP                | 216    | Y                   | N              |                         |                 |              |              | Y          |                           | Hydrophob_seed; PF14547.4    |
| Potri.006G008600                          | PtPRP10  | PRP                | 214    | Y                   | N              |                         |                 |              |              | Y          |                           | Hydrophob_seed; PF14547.4    |
| Potri.002G201800                          | PtPRP34  | PRP                | 213    | Y                   | N              |                         |                 |              |              | Y          |                           | Ole_e_; PF01190.15           |
| Potri.017G145800                          | PtPRP35  | PRP                | 272    | Y                   | N              |                         |                 |              |              | Y          |                           | Ole_e_; PF01190.15           |
| Potri.001G060500                          | PtPRP38  | PRP                | 332    | Y                   | N              |                         |                 |              |              | Y          |                           | Ole_e_; PF01190.15           |
| Potri.003G167100                          | PtPRP40  | PRP                | 299    | Y                   | N              |                         |                 |              |              | Y          |                           | Ole_e_; PF01190.15           |
| Potri.007G114400                          | PtPRP44  | PRP                | 275    | Y                   | N              |                         | N               |              |              |            |                           | -                            |
| Potri.013G111600                          | PtPRP46  | PRP                | 216    | Y                   | N              |                         | N               |              |              |            |                           | -                            |

<sup>a</sup> BIO OHIO v2/manual curation from Showalter et al. (2016)

<sup>b</sup> AG-peptides, chimeric AGPs (FLAs and PAGs) and most chimeric extensins are not included. Y\* is from Showalter et al. (2016) and denotes modified sequence or parameters SignalP.

<sup>c</sup> Reason for exclusion (-) by MAAB (dark red) additional reason(s) (light red)

<sup>d</sup> Re-analysis of Potri.017G047500 and Potri.009G092300 from Phytozome v11 shows not GPI-anchored using same predictor (BIG-PI plant predictor). Downloaded proteins same len;

<sup>e</sup> Re-analysis of Potri.001G259600 from Phytozome v11 shows no ER signal using the same predictor (SignalP). Downloaded protein same length.
